# Supplementary material
Source: Springer Nature journal article supplement (https://www.springermedizin.de/resource/supplementary/12887_2005_99_MOESM5_ESM.pdf/9477266)
Supplement: MOESM5 [file 9477266]

## Haemoglobin < 8 g/dL

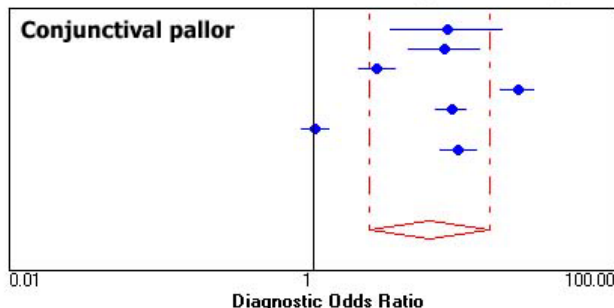

| Study        | Diagnostic OR (95% CI) |
|--------------|------------------------|
| Getaneh 2000 | 7.68 (3.29 - 17.96)    |
| Kalter 1997  | 7.45 (4.30 - 12.88)    |
| Luby 1995    | 2.67 (2.00 - 3.58)     |
| Muhe 2000    | 22.52 (17.19 - 29.50)  |
| Zucker 1997a | 8.25 (6.47 - 10.53)    |
| Zucker 1997b | 1.04 (0.84 - 1.29)     |
| Zucker 1997c | 9.15 (6.89 - 12.14)    |

Random Effects Model  
 Pooled Diagnostic Odds Ratio = 5.94 (2.38 to 14.79)  
 Cochran-Q = 377.04; df = 6 (p = 0.0000)

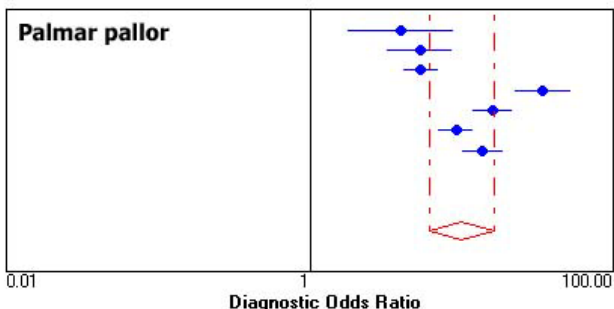

| Study        | Diagnostic OR (95% CI) |
|--------------|------------------------|
| Getaneh 2000 | 4.02 (1.80 - 9.00)     |
| Kalter 1997  | 5.32 (3.25 - 8.72)     |
| Luby 1995    | 5.42 (4.14 - 7.10)     |
| Muhe 2000    | 34.62 (22.55 - 53.14)  |
| Zucker 1997a | 16.24 (12.01 - 21.96)  |
| Zucker 1997b | 9.27 (7.14 - 12.03)    |
| Zucker 1997c | 13.84 (10.12 - 18.91)  |

Random Effects Model  
 Pooled Diagnostic Odds Ratio = 10.06 (6.16 to 16.41)  
 Cochran-Q = 80.37; df = 6 (p = 0.0000)

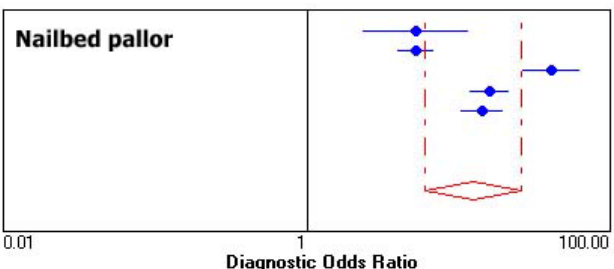

| Study        | Diagnostic OR (95% CI) |
|--------------|------------------------|
| Getaneh 2000 | 5.27 (2.34 - 11.84)    |
| Luby 1995    | 5.24 (4.00 - 6.85)     |
| Muhe 2000    | 41.40 (26.95 - 63.58)  |
| Zucker 1997a | 16.24 (12.01 - 21.96)  |
| Zucker 1997b | 14.35 (10.46 - 19.68)  |

Random Effects Model  
 Pooled Diagnostic Odds Ratio = 12.42 (5.97 to 25.85)  
 Cochran-Q = 81.22; df = 4 (p = 0.0000)
